# Supplementary material for: A Causal Role of Genetically Elevated Circulating Interleukin-10 in the Development of Digestive Cancers: Evidence from Mendelian Randomization Analysis Based on 29,307 Subjects
Source: PubMed Central journal article supplement (PMC4998630; doi:10.1097/md.0000000000002799), 2016-02-18
Supplement: medi-95-e2799-s002.pdf [file medi-95-e2799-s002.pdf]

## Supplementary figure legend

**Figure S1.** Risk estimates of IL-10 gene -1082A>G for cancer risk in East Asian population under the homozygous genotypic (A) and dominant (B) models. The summary treatment effect (OR) is shown by the middle of a solid diamond whose left and right extremes represent the corresponding 95% confidence interval (95% CI). Horizontal axis represents OR values, which were calculated against healthy controls.

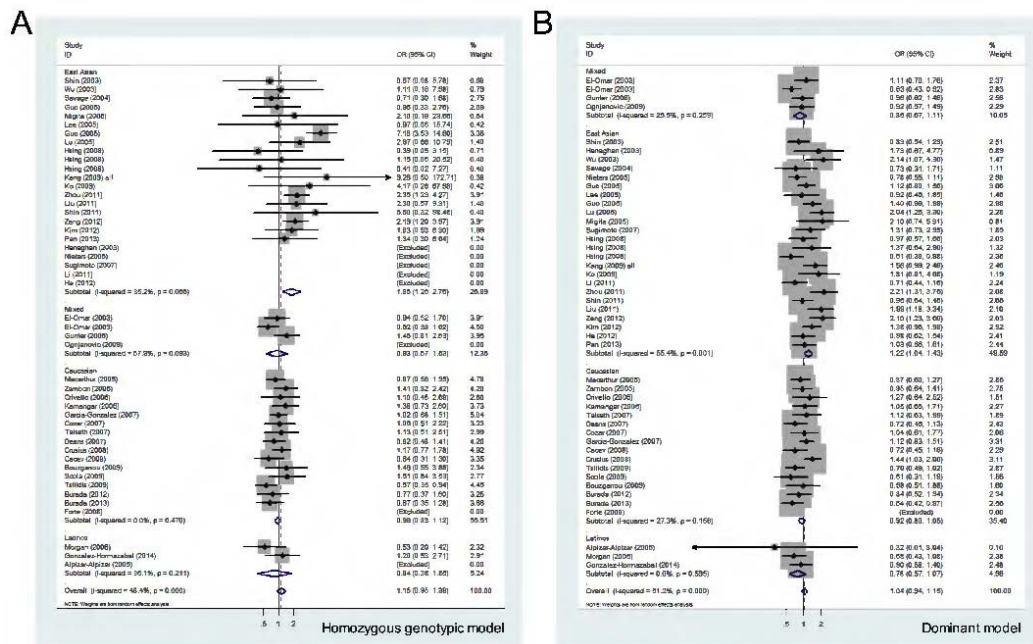

**Figure S2.** Risk estimates of IL-10 gene -1082A>G for gastric cancer under the homozygous genotypic (A) and dominant (B) models. The summary treatment effect (OR) is shown by the middle of a solid diamond whose left and right extremes represent the corresponding 95% confidence interval (95% CI). Horizontal axis represents OR values, which were calculated against healthy controls.

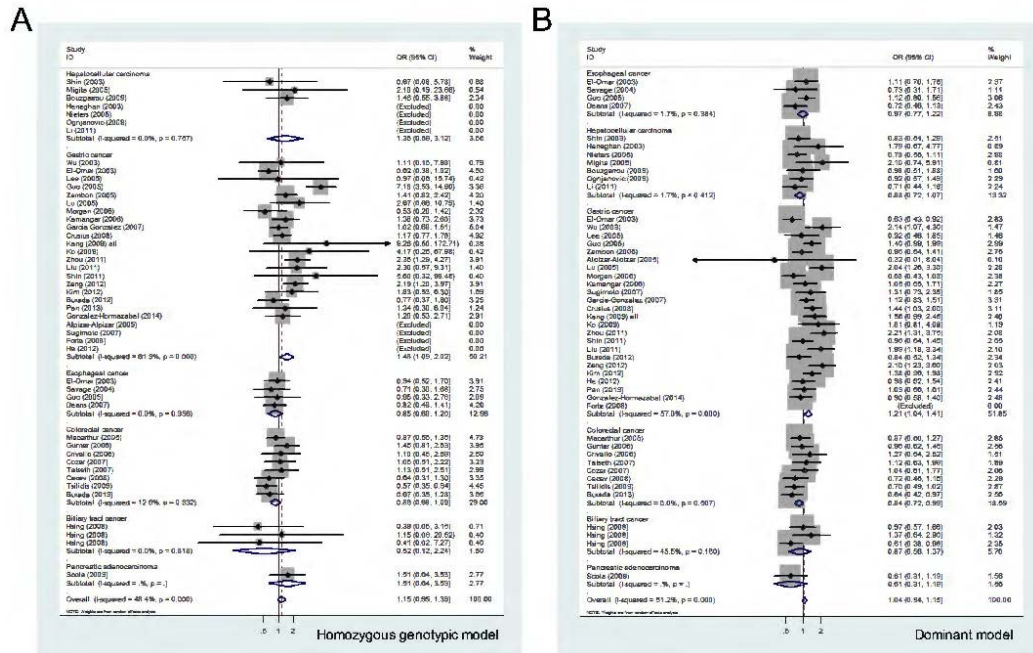

**Figure S3.** Risk estimates of IL-10 gene -1082A>G for intestinal type of gastric cancer under the homozygous genotypic (A) and dominant (B) models. The summary treatment effect (OR) is shown by the middle of a solid diamond whose left and right extremes represent the corresponding 95% confidence interval (95% CI). Horizontal axis represents OR values, which were calculated against healthy controls.

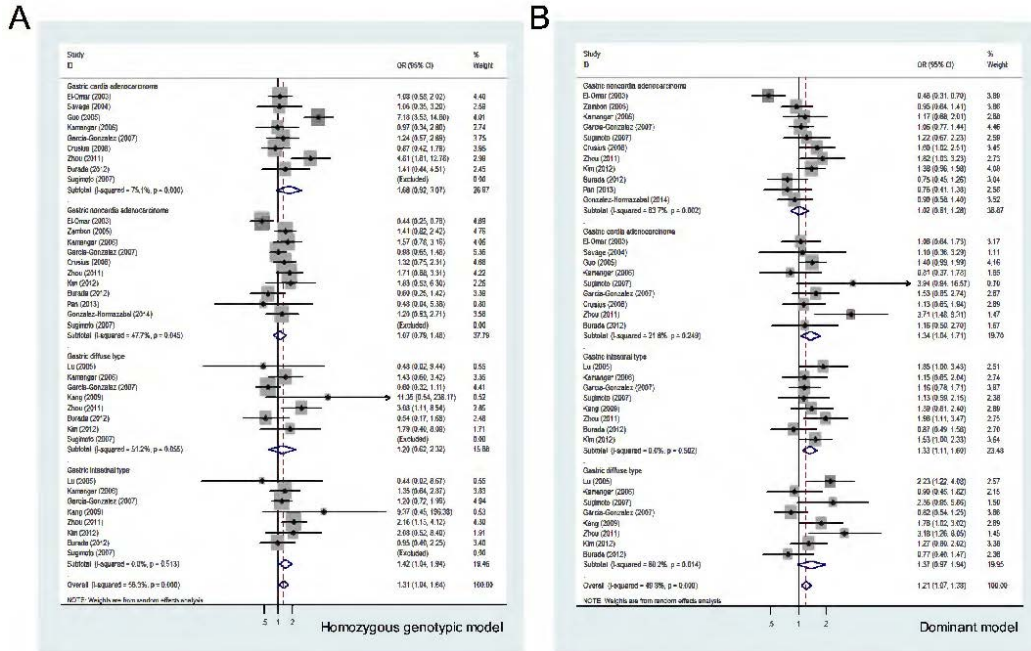

**Figure S4.** Comparison of IL-10 gene -592 C>A or -819 C>T genotypes for circulating IL-10 level in the allelic and dominant models. A. -592 C>A genotypes under allelic model; B. -592 C>A genotypes under dominant model; C. -819 C>T genotypes under allelic model; D. -819 C>T genotypes under dominant model. The summary treatment effect (standard mean difference or SMD) is shown by the middle of a solid diamond whose left and right extremes represent the corresponding 95% confidence interval (95% CI).

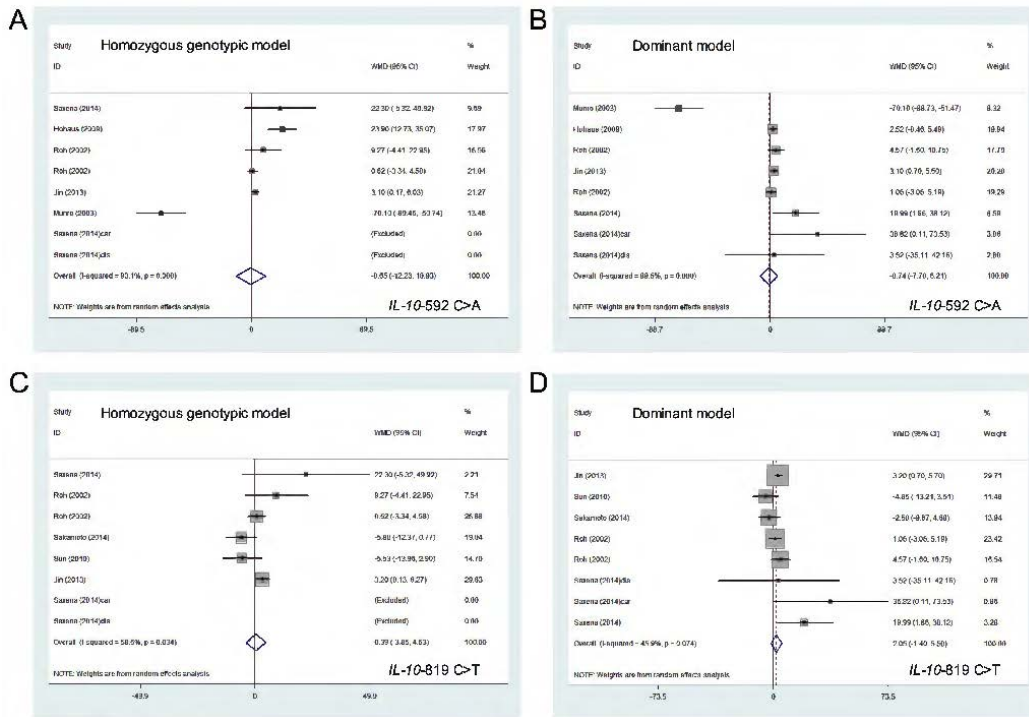

**Supplementary Table S1.** The genotype distributions of three examined variants in IL-10 gene between digestive cancer patients and controls in all qualified studies

| Author (year)              | IL-10 gene -692 C>A (rs1800672) |         |         |            |            |            | IL-10 gene -819C>T (rs1800671) |         |         |            |            |            | IL-10 gene -1082A>G (rs1800666) |         |         |            |            |            |
|----------------------------|---------------------------------|---------|---------|------------|------------|------------|--------------------------------|---------|---------|------------|------------|------------|---------------------------------|---------|---------|------------|------------|------------|
|                            | Case_CC                         | Case_CA | Case_AA | Control_CC | Control_CA | Control_AA | Case_CC                        | Case_CT | Case_TT | Control_CC | Control_CT | Control_TT | Case_AA                         | Case_AG | Case_GG | Control_AA | Control_AG | Control_GG |
| Alpizar-Alpizar (2005)     | 21                              | 20      | 3       | 18         | 21         | 5          | 25                             | 16      | 4       | 18         | 24         | 3          | 45                              | 0       | 0       | 43         | 1          | 0          |
| Andersen (2012)            | 238                             | 116     | 24      | 470        | 261        | 44         | NA                             | NA      | NA      | NA         | NA         | NA         | NA                              | NA      | NA      | NA         | NA         | NA         |
| Ando (2009)                | 23                              | 147     | 160     | 16         | 97         | 77         | NA                             | NA      | NA      | NA         | NA         | NA         | NA                              | NA      | NA      | NA         | NA         | NA         |
| Bei (2014)                 | 52                              | 312     | 356     | 79         | 313        | 392        | NA                             | NA      | NA      | NA         | NA         | NA         | NA                              | NA      | NA      | NA         | NA         | NA         |
| Bouzgarrou (2009)          | NA                              | NA      | NA      | NA         | NA         | NA         | NA                             | NA      | NA      | NA         | NA         | NA         | 24                              | 24      | 10      | 42         | 49         | 12         |
| Burada (2012)              | NA                              | NA      | NA      | NA         | NA         | NA         | NA                             | NA      | NA      | NA         | NA         | NA         | 43                              | 49      | 13      | 89         | 118        | 35         |
| Burada (2013)              | NA                              | NA      | NA      | NA         | NA         | NA         | NA                             | NA      | NA      | NA         | NA         | NA         | 65                              | 60      | 19      | 80         | 118        | 35         |
| Čadež (2008)               | 83                              | 64      | 13      | 104        | 52         | 4          | 83                             | 64      | 13      | 106        | 51         | 3          | 54                              | 86      | 20      | 43         | 92         | 25         |
| Cozar (2007)               | 52                              | 41      | 2       | 98         | 63         | 14         | 52                             | 41      | 2       | 98         | 63         | 14         | 31                              | 48      | 17      | 58         | 87         | 30         |
| Civello (2006)             | 31                              | 28      | 3       | 89         | 48         | 7          | NA                             | NA      | NA      | NA         | NA         | NA         | 16                              | 34      | 12      | 38         | 60         | 26         |
| Crustus (2008)             | 148                             | 78      | 11      | 642        | 397        | 83         | 145                            | 72      | 12      | 638        | 378        | 80         | 54                              | 131     | 50      | 340        | 526        | 268        |
| de Oliveira (2013)         | 100                             | 96      | 4       | 169        | 65         | 6          | NA                             | NA      | NA      | NA         | NA         | NA         | NA                              | NA      | NA      | NA         | NA         | NA         |
| Deans (2007)               | NA                              | NA      | NA      | NA         | NA         | NA         | NA                             | NA      | NA      | NA         | NA         | NA         | 53                              | 93      | 54      | 46         | 120        | 57         |
| El-Omar (2003) a           | 107                             | 44      | 10      | 127        | 70         | 13         | NA                             | NA      | NA      | NA         | NA         | NA         | 42                              | 87      | 32      | 59         | 103        | 48         |
| El-Omar (2003) b           | 178                             | 101     | 35      | 127        | 70         | 13         | NA                             | NA      | NA      | NA         | NA         | NA         | 120                             | 133     | 61      | 59         | 103        | 48         |
| Forle (2008)               | NA                              | NA      | NA      | NA         | NA         | NA         | NA                             | NA      | NA      | NA         | NA         | NA         | 0                               | 37      | 5       | 0          | 149        | 36         |
| García-González (2007)     | 237                             | 143     | 24      | 245        | 131        | 28         | NA                             | NA      | NA      | NA         | NA         | NA         | 123                             | 204     | 77      | 133        | 189        | 82         |
| González-Hermazabal (2014) | 55                              | 73      | 19      | 78         | 83         | 11         | NA                             | NA      | NA      | NA         | NA         | NA         | 79                              | 54      | 14      | 88         | 71         | 13         |
| Gunter (2006)              | NA                              | NA      | NA      | NA         | NA         | NA         | 125                            | 76      | 21      | 117        | 79         | 13         | 61                              | 114     | 47      | 55         | 123        | 29         |
| Guo (2005) a               | NA                              | NA      | NA      | NA         | NA         | NA         | NA                             | NA      | NA      | NA         | NA         | NA         | 117                             | 81      | 5       | 267        | 164        | 12         |
| Guo (2005) b               | NA                              | NA      | NA      | NA         | NA         | NA         | NA                             | NA      | NA      | NA         | NA         | NA         | 93                              | 56      | 30      | 267        | 164        | 12         |
| He (2012)                  | 18                              | 96      | 82      | 28         | 128        | 92         | 18                             | 96      | 82      | 28         | 128        | 92         | 154                             | 42      | 0       | 194        | 54         | 0          |
| Heneghan (2003)            | 11                              | 38      | 49      | 13         | 30         | 54         | 11                             | 38      | 49      | 13         | 30         | 54         | 86                              | 12      | 0       | 90         | 7          | 0          |
| Hsing (2008) a             | 52                              | 16      | 57      | 352        | 90         | 340        | 17                             | 52      | 55      | 90         | 353        | 334        | 107                             | 18      | 0       | 664        | 108        | 7          |
| Hsing (2008) b             | 6                               | 21      | 19      | 352        | 90         | 340        | 21                             | 6       | 20      | 90         | 353        | 334        | 38                              | 9       | 0       | 664        | 108        | 7          |
| Hsing (2008) c             | 23                              | 91      | 121     | 82         | 334        | 318        | 23                             | 92      | 122     | 82         | 335        | 311        | 231                             | 23      | 1       | 624        | 99         | 7          |
| Kamangar (2006)            | 68                              | 38      | 6       | 109        | 82         | 17         | 58                             | 35      | 5       | 80         | 62         | 10         | 38                              | 47      | 27      | 72         | 96         | 37         |
| Kang (2009)                | 34                              | 157     | 142     | 41         | 145        | 146        | NA                             | NA      | NA      | NA         | NA         | NA         | 281                             | 49      | 4       | 289        | 35         | 0          |
| Kim (2012)                 | 50                              | 214     | 231     | 56         | 191        | 248        | 50                             | 214     | 231     | 56         | 191        | 248        | 416                             | 72      | 7       | 435        | 56         | 4          |
| Ko (2009)                  | 0                               | 33      | 25      | 0          | 110        | 121        | 0                              | 33      | 25      | 0          | 111        | 122        | 46                              | 9       | 1       | 192        | 22         | 1          |
| Lee (2005)                 | 8                               | 62      | 52      | 7          | 60         | 53         | NA                             | NA      | NA      | NA         | NA         | NA         | 104                             | 17      | 1       | 101        | 18         | 1          |
| Li (2011)                  | 16                              | 134     | 0       | 34         | 313        | 0          | 22                             | 144     | 0       | 39         | 323        | 0          | 132                             | 26      | 0       | 278        | 77         | 0          |
| Liu (2011)                 | 39                              | 96      | 99      | 28         | 106        | 109        | 39                             | 96      | 99      | 28         | 106        | 109        | 189                             | 39      | 6       | 217        | 23         | 3          |
| Lu (2005)                  | NA                              | NA      | NA      | NA         | NA         | NA         | NA                             | NA      | NA      | NA         | NA         | NA         | 201                             | 43      | 6       | 268        | 29         | 3          |
| MacArthur (2005)           | 151                             | 99      | 8       | 248        | 133        | 22         | NA                             | NA      | NA      | NA         | NA         | NA         | 61                              | 125     | 71      | 86         | 202        | 115        |
| Migita (2005)              | 8                               | 23      | 17      | 25         | 78         | 85         | 8                              | 23      | 17      | 25         | 78         | 85         | 42                              | 5       | 1       | 176        | 10         | 2          |
| Morgan (2006)              | NA                              | NA      | NA      | NA         | NA         | NA         | NA                             | NA      | NA      | NA         | NA         | NA         | 121                             | 42      | 7       | 101        | 49         | 11         |
| Nieters (2005)             | NA                              | NA      | NA      | NA         | NA         | NA         | 0                              | 119     | 130     | 0          | 135        | 115        | 130                             | 119     | 0       | 115        | 135        | 0          |
| Orijanovic (2009)          | NA                              | NA      | NA      | NA         | NA         | NA         | NA                             | NA      | NA      | NA         | NA         | NA         | 39                              | 79      | 0       | 67         | 147        | 0          |
| Pan (2013)                 | 36                              | 128     | 144     | 31         | 135        | 142        | NA                             | NA      | NA      | NA         | NA         | NA         | 263                             | 41      | 4       | 264        | 41         | 3          |
| Savage (2004)              | 51                              | 51      | 17      | 171        | 166        | 49         | 17                             | 46      | 53      | 49         | 163        | 170        | 8                               | 26      | 81      | 20         | 81         | 284        |
| Saxena (2014)              | 9                               | 47      | 3       | 36         | 87         | 22         | 9                              | 47      | 3       | 36         | 87         | 22         | NA                              | NA      | NA      | NA         | NA         | NA         |
| Scota (2009)               | NA                              | NA      | NA      | NA         | NA         | NA         | NA                             | NA      | NA      | NA         | NA         | NA         | 23                              | 11      | 14      | 47         | 65         | 19         |
| Shin (2003)                | 26                              | 101     | 89      | 65         | 299        | 384        | NA                             | NA      | NA      | NA         | NA         | NA         | 201                             | 28      | 1       | 675        | 112        | 5          |
| Shin (2011)                | 60                              | 291     | 283     | 32         | 108        | 103        | NA                             | NA      | NA      | NA         | NA         | NA         | 534                             | 91      | 7       | 199        | 38         | 0          |
| Scisinschi (2006)          | 51                              | 90      | 40      | 98         | 176        | 95         | NA                             | NA      | NA      | NA         | NA         | NA         | NA                              | NA      | NA      | NA         | NA         | NA         |
| Sugimoto (2007)            | 8                               | 54      | 43      | 10         | 70         | 88         | 6                              | 57      | 42      | 9          | 73         | 86         | 78                              | 26      | 0       | 134        | 34         | 0          |
| Sun (2013)                 | 31                              | 163     | 162     | 33         | 141        | 191        | NA                             | NA      | NA      | NA         | NA         | NA         | NA                              | NA      | NA      | NA         | NA         | NA         |
| Talseth (2007)             | 62                              | 51      | 4       | 50         | 45         | 4          | NA                             | NA      | NA      | NA         | NA         | NA         | 36                              | 61      | 21      | 33         | 50         | 17         |
| Tsang (2006)               | 31                              | 84      | 91      | 27         | 147        | 169        | NA                             | NA      | NA      | NA         | NA         | NA         | NA                              | NA      | NA      | NA         | NA         | NA         |
| Tsilidis (2009)            | 123                             | 71      | 9       | 213        | 131        | 17         | NA                             | NA      | NA      | NA         | NA         | NA         | 69                              | 101     | 35      | 98         | 187        | 87         |
| Vishni (2007)              | NA                              | NA      | NA      | NA         | NA         | NA         | 43                             | 61      | 20      | 70         | 93         | 37         | NA                              | NA      | NA      | NA         | NA         | NA         |
| Wu (2003)                  | 27                              | 105     | 88      | 20         | 83         | 127        | 27                             | 105     | 88      | 20         | 83         | 127        | 195                             | 23      | 2       | 217        | 11         | 2          |
| Zambon (2005)              | 70                              | 42      | 17      | 353        | 245        | 46         | 70                             | 42      | 17      | 353        | 245        | 46         | 48                              | 56      | 25      | 232        | 326        | 86         |
| Zeng (2012)                | 15                              | 77      | 59      | 7          | 66         | 80         | 11                             | 80      | 60      | 10         | 65         | 78         | 27                              | 60      | 64      | 48         | 53         | 52         |
| Zhou (2011)                | NA                              | NA      | NA      | NA         | NA         | NA         | NA                             | NA      | NA      | NA         | NA         | NA         | 29                              | 62      | 59      | 52         | 53         | 45         |

Abbreviations: NA, not available.



**Supplementary Table S3.** Changes of circulating IL-10 level across genotypes of three examined variants in IL-10 gene

| IL-10 gene -592C>A<br>Author/year | Ethnicity  | Status   | Sample size | CC genotype |                     | CA genotype |                     | AA genotype |                     |
|-----------------------------------|------------|----------|-------------|-------------|---------------------|-------------|---------------------|-------------|---------------------|
|                                   |            |          |             | Number      | IL-10 level (pg/ml) | Number      | IL-10 level (pg/ml) | Number      | IL-10 level (pg/ml) |
| Hohaus (2009)                     | Caucasian  | Cases    | 95          | NA          | NA                  | 85          | 29.20               | 10          | 53.10               |
| Jin (2013)                        | East Asian | Cases    | 180         | 96          | 10.1                | 84          | 13.20               | NA          | NA                  |
| Munro (2003)                      | Caucasian  | Cases    | 25          | 15          | 106                 | 10          | 35.90               | NA          | NA                  |
| Roh (2002) a                      | East Asian | Controls | 179         | 15          | 3.93                | 77          | 3.20                | 87          | 13.20               |
| Roh (2002) b                      | East Asian | Cases    | 144         | 11          | 2.55                | 56          | 4.22                | 77          | 3.17                |
| Saxena (2014) a                   | Indian     | Controls | 145         | 36          | 51.08               | 87          | 70.22               | 32          | 73.38               |
| Saxena (2014) b                   | Indian     | Cases    | 62          | 5           | 36.69               | 52          | 80.58               | 5           | 0.00                |
| Saxena (2014) c                   | Indian     | Cases    | 183         | 20          | 71.94               | 156         | 78.85               | 7           | 0.00                |
| IL-10 gene -819C>T                | Ethnicity  | Status   | Sample size | CC genotype |                     | CT genotype |                     | TT genotype |                     |
| Jin (2013)                        | East Asian | Cases    | 180         | 99          | 9.60                | 81          | 12.80               | NA          | NA                  |
| Roh (2002) a                      | East Asian | Controls | 179         | 15          | 3.93                | 77          | 3.20                | 87          | 13.20               |
| Roh (2002) b                      | East Asian | Cases    | 144         | 11          | 2.55                | 56          | 4.22                | 77          | 3.17                |
| Sakamoto (2014)                   | East Asian | Cases    | 86          | NA          | NA                  | 49          | 9.60                | 37          | 3.80                |
| Saxena (2014) a                   | Indian     | Controls | 145         | 36          | 51.08               | 87          | 70.22               | 32          | 73.38               |
| Saxena (2014) b                   | Indian     | Cases    | 62          | 5           | 36.69               | 52          | 80.58               | 5           | 0.00                |
| Saxena (2014) c                   | Indian     | Cases    | 183         | 20          | 71.94               | 156         | 78.85               | 7           | 0.00                |
| Sun (2010)                        | East Asian | Cases    | 116         | 7           | 59.71               | NA          | NA                  | 50          | 54.18               |
| IL-10 gene -1082A>G               | Ethnicity  | Status   | Sample size | AA genotype |                     | AG genotype |                     | GG genotype |                     |
| Hohaus (2009)                     | Caucasian  | Cases    | 95          | NA          | NA                  | 87          | 29.20               | 8           | 56.20               |
| Jin (2013)                        | East Asian | Cases    | 180         | 68          | 10.70               | 112         | 12.60               | NA          | NA                  |
| Munro (2003)                      | Caucasian  | Cases    | 26          | 3           | 43.00               | 11          | 67.80               | 12          | 91.70               |
| Sun (2010)                        | East Asian | Cases    | 116         | 97          | 50.13               | 19          | 94.31               | 0           | 0.00                |
